# Supplementary material for: Optimizing co-location calibration periods for low-cost sensors
Source: Copernicus journal article supplement (doi:10.5194/egusphere-2022-200), 2022-04-28

## Optimizing co-location calibration periods for low-cost sensors

Misti Levy Zamora<sup>1,2,3\*</sup>, Colby Buehler<sup>3,4</sup>, Abhirup Datta<sup>5</sup>, Drew R. Gentner<sup>3,4</sup>, Kirsten Koehler<sup>2,3</sup>

<sup>1</sup>University of Connecticut Health Center, Department of Public Health Sciences UConn School of Medicine, 263  
5 Farmington Avenue, Farmington, CT, USA 06032-1941

<sup>2</sup>Johns Hopkins University Bloomberg School of Public Health, Environmental Health and Engineering  
615 N Wolfe St, Baltimore, MD, USA 21205-2103

<sup>3</sup>SEARCH (Solutions for Energy, Air, Climate and Health) Center, Yale University, New Haven, CT, USA 06520

<sup>4</sup>Yale University, Chemical and Environmental Engineering, PO Box 208286, New Haven, CT, USA 06520

10 <sup>5</sup>Johns Hopkins University Bloomberg School of Public Health, Department of Biostatistics  
615 N. Wolfe Street, Baltimore, MD, USA 21205-2103

*Correspondence to:* Misti Levy Zamora (mzamora@UCHC.edu)

**Supplemental Figure 1.** The start time of 250 randomly selected 24-hr calibration runs.

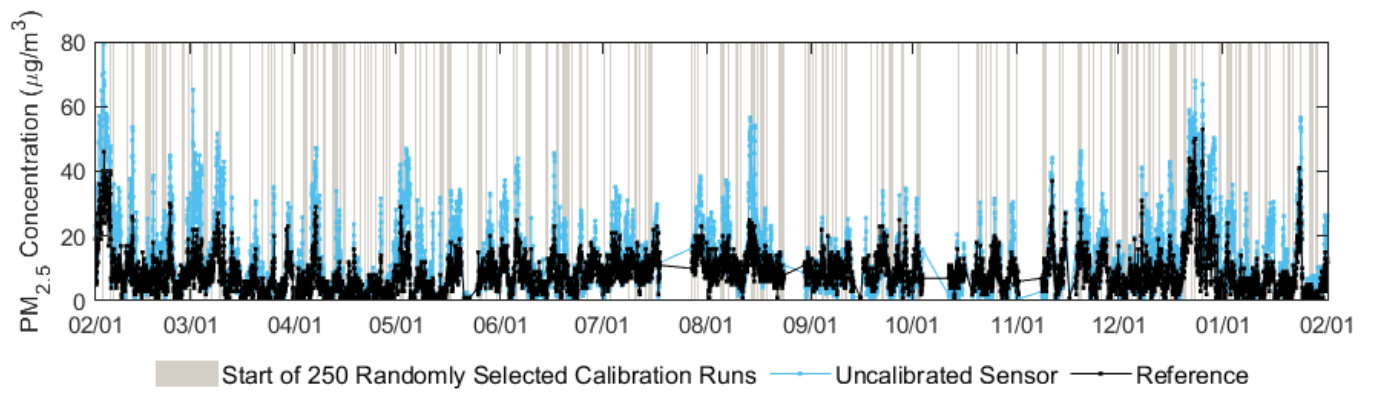

20 **Supplemental Figure 2.** The potential range of Pearson correlation coefficients ( $r$ ) for three low-cost  
sensors ( $\text{NO}_2$ ,  $\text{O}_3$ , and  $\text{NO}$ ) by co-location length. A calibration length of 1 day indicates that a random  
24-hour period was selected out of all available days between February 2019 and February 2020. The  
correlation for a given test calibration period was determined by comparing the 1-hour averaged  
reference and the corrected sensor data (using that calibration) across all days not included in the  
25 calibration period.

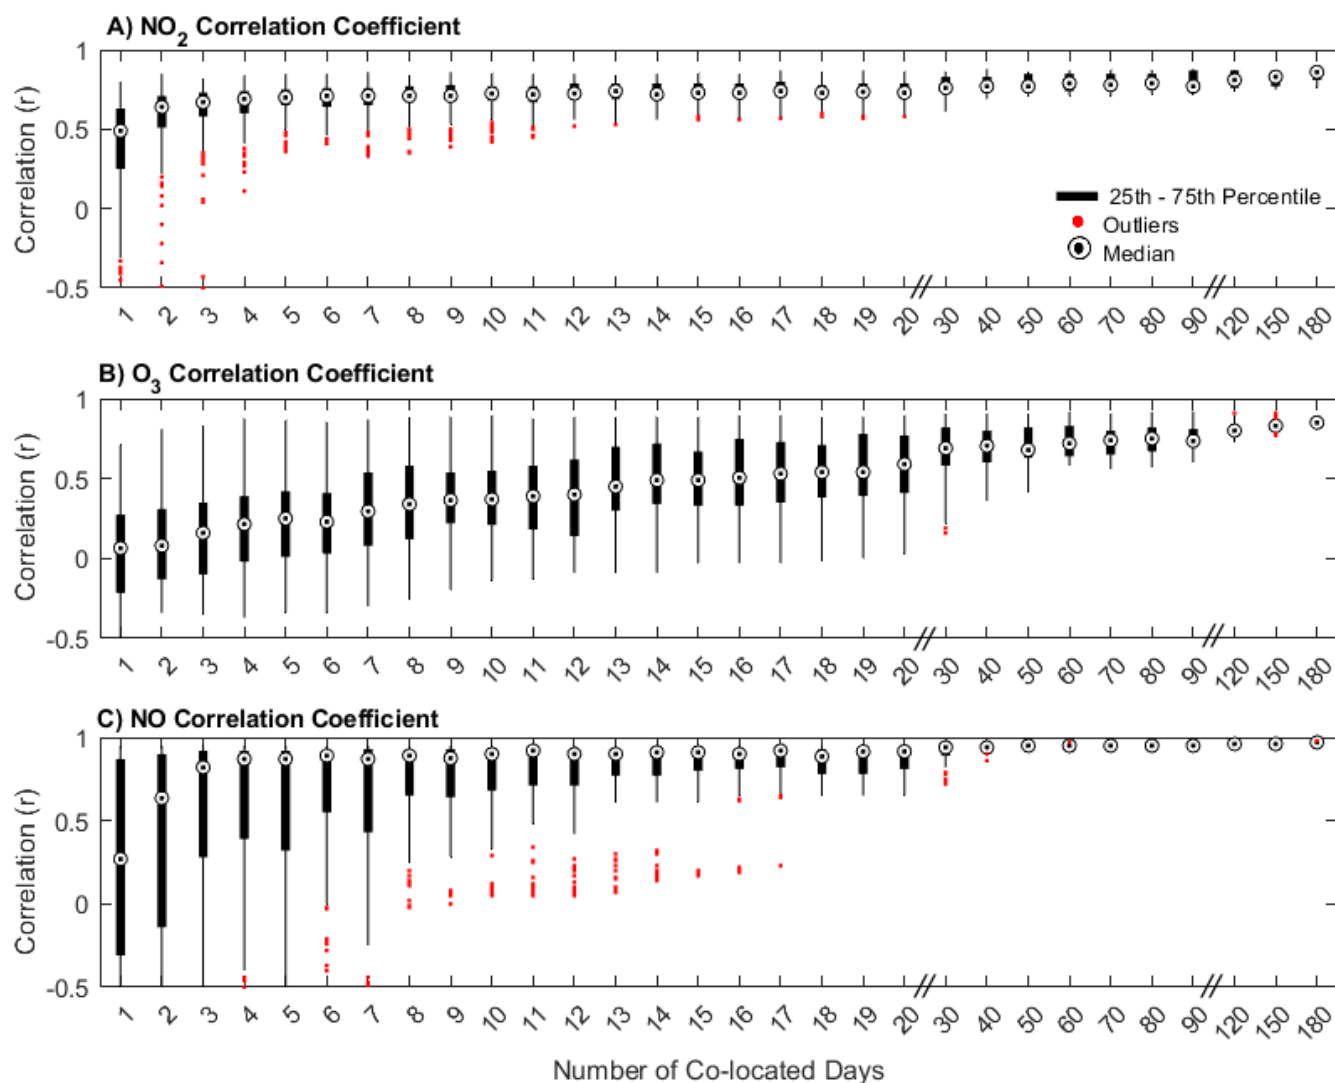

30 **Supplemental Figure 3.** Comparison of two potential one-week calibration periods corresponding to  
Figure 3. These were selected to illustrate the range of potential RMSE values that can result from  
using different periods of the same co-location duration. In the example here, “Calibration Period 1”  
yielded more accurate concentrations (shown in green; RMSE = 3.1  $\mu\text{g}/\text{m}^3$ ), while “Calibration Period 2”  
performed poorly when considered across the whole evaluation period (shown in red; RMSE = 19.5  
35  $\mu\text{g}/\text{m}^3$ ).

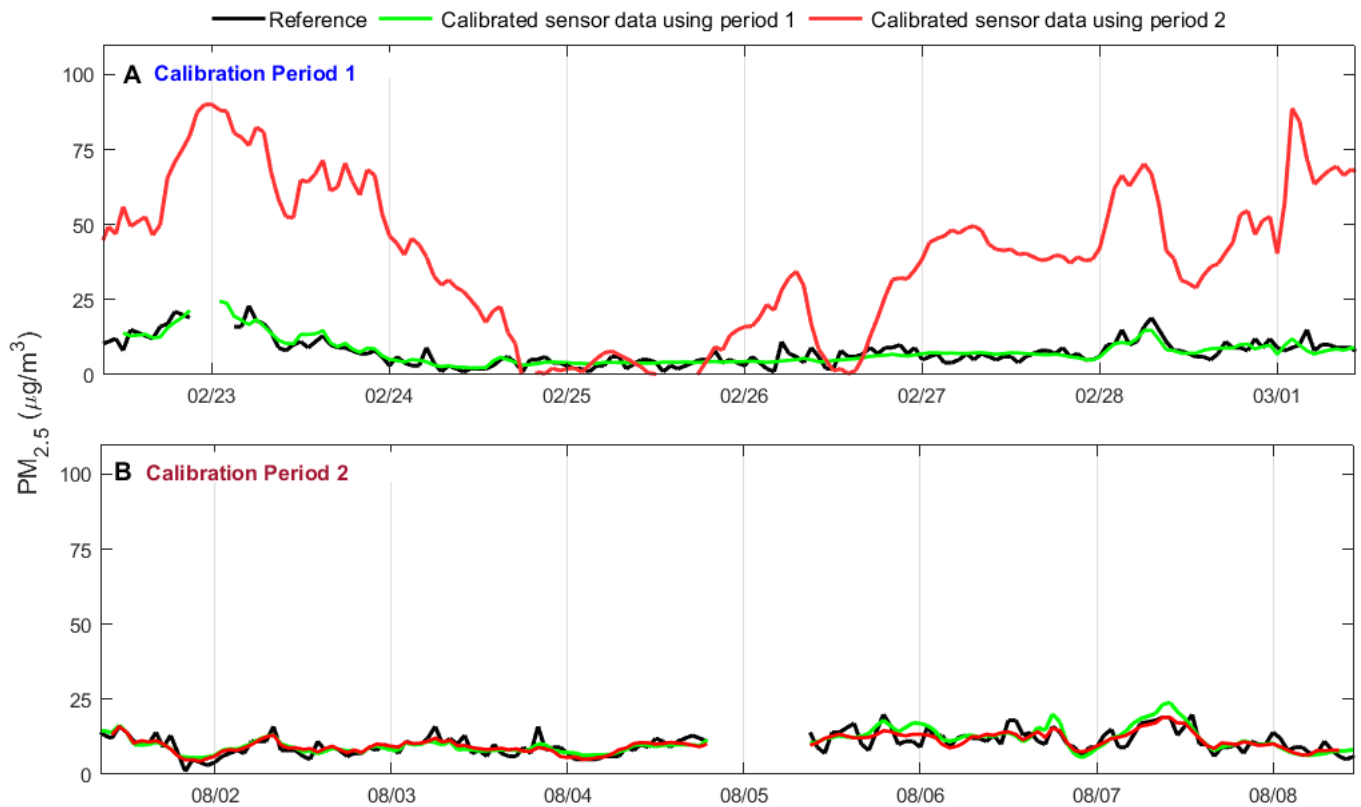

Supplement: Supplementary file 1 [file egusphere-2022-200-supplement.pdf]
